# Supplementary material for: Predicting 7-day, 30-day and 60-day all-cause unplanned readmission: a case study of a Sydney hospital
Source: Springer Nature journal article supplement (doi:10.1186/s12911-017-0580-8), 2018-01-04
Supplement: MOESM1 [file 15344858]

## Supplementary Material

**Table S1: Parameters of the Gradient Tree Boosting algorithm. In this study, we used the freely available gradient tree boosting algorithm implemented in the R package XGBoost with the following parameters chosen via manual tuning:**

| Parameter                                                                              | Value | Variable name in R package XGBoost <sup>23</sup> |
|----------------------------------------------------------------------------------------|-------|--------------------------------------------------|
| Number rounds                                                                          | 1,000 | nrounds                                          |
| Maximum depth of each tree                                                             | 5     | max_depth                                        |
| Factor scaling the contribution of each tree                                           | 0.01  | eta                                              |
| Minimum loss reduction required to make a further partition on a leaf node of the tree | 1     | gamma                                            |
| Maximum gradient delta step for tree weight estimation                                 | 1     | max_delta_step                                   |
| Minimum sum of instance weigh in a child                                               | 5     | min_child_weight                                 |
| Subsample ratio of the training instance                                               | 0.5   | subsample                                        |
| Subsample ratio of columns when constructing each tree                                 | 0.6   | colsample_bytree                                 |

**Table S2: Conversion of continuous variables into categorical variables (cutting points)**

| Name of the feature        | Number of levels | Cutting points                       |
|----------------------------|------------------|--------------------------------------|
| LOS (hours)                | 6                | 12, 24, 48, 72, 168                  |
| Age (years)                | 5                | 25, 45, 65, 85                       |
| Cumulative LOS (hours)     | 3                | 0, 168                               |
| Days from last admission   | 3                | 30, 365                              |
| Number of pathology tests  | 6                | 0, 25, 50, 100, 200                  |
| Number of pathology panels | 5                | 0, 1, 5, 10                          |
| Hours since last surgery   | 4                | (no surgery), 6, 48                  |
| Hours since last panel     | 5                | (no panel), 0, 6, 24                 |
| Admission type             | 3                | (Medical), Minor Surgery*, Surgery** |

\*: Minor Surgery is defined as surgeries with not more than 1 hour duration.  
 \*\*: Surgery is defined as surgeries with more than 1 hour duration.

| Table S3: Characteristics of patients and their hospital admissions for the study population |                                                                    |                 |                     |                         |             |                          |                  |
|----------------------------------------------------------------------------------------------|--------------------------------------------------------------------|-----------------|---------------------|-------------------------|-------------|--------------------------|------------------|
| Feature                                                                                      | Statistics                                                         |                 |                     |                         |             |                          |                  |
|                                                                                              | 25 <sup>th</sup> -Perc.                                            | Median          | Mean                | 75 <sup>th</sup> -Perc. | STD         | Reference value          |                  |
| Age (years)                                                                                  | 34.0                                                               | 52.0            | 51.9                | 68.0                    | 20.1        | <=25 years               |                  |
| Cumulative LOS in the past year (hours)                                                      | 0                                                                  | 0               | 85.1                | 5.9                     | 343.5       | 0 hours                  |                  |
| Days since last admission                                                                    | 237.8                                                              | 365.5           | 290.2               | 365.5                   | 127.5       | >365 days (no admission) |                  |
| Number of pathology tests                                                                    | 3.0                                                                | 37.0            | 83.5                | 70.0                    | 226.0       | 0                        |                  |
| Number of pathology panels                                                                   | 2.0                                                                | 8.0             | 10.1                | 13.0                    | 11.1        | 0                        |                  |
| Hours since last surgery                                                                     | 0                                                                  | 0               | 22.4                | 5.0                     | 74.6        | (no surgery)             |                  |
| Length of stay (hours)                                                                       | 6.8                                                                | 22.6            | 74.3                | 74.4                    | 166.6       | <=12 hours               |                  |
| Gender (%)                                                                                   | Male                                                               |                 |                     | Female                  |             |                          |                  |
|                                                                                              | 57                                                                 |                 |                     | 43                      |             |                          | Male             |
| Day of Week Admission (%)                                                                    | Mon                                                                | Tue             | Wed                 | Thu                     | Fri         | Sat                      | Sun              |
|                                                                                              | 17.1                                                               | 17.1            | 16.3                | 17.3                    | 14.1        | 9.0                      | 8.8              |
| Day of Week Discharge (%)                                                                    | Mon                                                                | Tue             | Wed                 | Thu                     | Fri         | Sat                      | Sun              |
|                                                                                              | 15.5                                                               | 17.0            | 16.7                | 17.6                    | 16.7        | 9.1                      | 7.1              |
| Time of Day Admission (%)                                                                    | 00:00-07:59                                                        |                 | 08:00-15:59         |                         | 16:00-23:59 |                          |                  |
|                                                                                              | 25.9                                                               |                 | 47.4                |                         | 26.5        |                          |                  |
| Time of Day Discharge (%)                                                                    | 00:00-07:59                                                        |                 | 08:00-15:59         |                         | 16:00-23:59 |                          |                  |
|                                                                                              | 4.9                                                                |                 | 64.1                |                         | 30.9        |                          |                  |
| Marital Code (%)                                                                             | Married                                                            | Never Married   | Widow               | Divorced/separated      | Unknown     |                          |                  |
|                                                                                              | 39.3                                                               | 40.2            | 6.8                 | 6.3                     | 7.2         |                          | Married          |
| Episode of care type (%)                                                                     | Acute care                                                         | Palliative care | Rehabilitation care |                         |             |                          |                  |
|                                                                                              | 99.2                                                               | 0.4             | 0.2                 |                         |             |                          | Acute care       |
| Source of referral (%)                                                                       | Emergency Department                                               |                 |                     |                         |             | 61.7                     | Others           |
|                                                                                              | Outpatients                                                        |                 |                     |                         |             | 9.3                      |                  |
|                                                                                              | Other Hospital                                                     |                 |                     |                         |             | 1.8                      |                  |
|                                                                                              | Other Medical Practitioner other than Private Psychiatric Practice |                 |                     |                         |             | 24.6                     |                  |
|                                                                                              | Hospital in same AHS                                               |                 |                     |                         |             | 0.4                      |                  |
|                                                                                              | Private Psychiatric Practice                                       |                 |                     |                         |             | 0.0                      |                  |
| Admission type                                                                               | Medical                                                            |                 |                     |                         |             | 61.2                     | Medical          |
|                                                                                              | Minor Surgery                                                      |                 |                     |                         |             | 19.6                     |                  |
|                                                                                              | Surgery                                                            |                 |                     |                         |             | 19.2                     |                  |
| Triage Code (%)                                                                              | Resuscitation                                                      |                 |                     |                         |             | 3.5                      | Ref=No ED        |
|                                                                                              | Emergency                                                          |                 |                     |                         |             | 13.8                     |                  |
|                                                                                              | Urgent                                                             |                 |                     |                         |             | 35.0                     |                  |
|                                                                                              | Semi-urgent                                                        |                 |                     |                         |             | 8.5                      |                  |
|                                                                                              | Non-urgent                                                         |                 |                     |                         |             | 0.3                      |                  |
|                                                                                              | No ED                                                              |                 |                     |                         |             | 38.7                     |                  |
| Arrival mode (%)                                                                             | Community/Public Transport                                         |                 |                     |                         |             | 17.7                     | Not from ED      |
|                                                                                              | Police/Correctional Services Vehicle                               |                 |                     |                         |             | 1.1                      |                  |
|                                                                                              | Private Car                                                        |                 |                     |                         |             | 12.7                     |                  |
|                                                                                              | Ambulance Service                                                  |                 |                     |                         |             | 29.5                     |                  |
|                                                                                              | Air Ambulance                                                      |                 |                     |                         |             | 0.0                      |                  |
|                                                                                              | Not from ED                                                        |                 |                     |                         |             | 38.7                     |                  |
|                                                                                              | Unknown                                                            |                 |                     |                         |             | 0.1                      |                  |
| Payment status (%)                                                                           | Medicare card holder and public patient                            |                 |                     |                         |             | 69.1                     | other or missing |
|                                                                                              | Medicare card holder and private patient                           |                 |                     |                         |             | 18.3                     |                  |
|                                                                                              | Overseas visitor                                                   |                 |                     |                         |             | 7.6                      |                  |
|                                                                                              | Veterans affairs                                                   |                 |                     |                         |             | 1.5                      |                  |
|                                                                                              | Prisoner                                                           |                 |                     |                         |             | 0.0                      |                  |
|                                                                                              | Trial patient                                                      |                 |                     |                         |             | 0.0                      |                  |
|                                                                                              | Other or missing                                                   |                 |                     |                         |             | 3.3                      |                  |

|                         |                                                                                                                                  |      |              |
|-------------------------|----------------------------------------------------------------------------------------------------------------------------------|------|--------------|
| <b>Ward type</b>        | Emergency/Mobile Unit                                                                                                            | 33.7 | Others       |
|                         | Day Procedure                                                                                                                    | 19.0 |              |
|                         | Cardiology                                                                                                                       | 8.2  |              |
|                         | Cardiothoracic Surgery and Transplant                                                                                            | 6.1  |              |
|                         | Orthopaedics, Urology, Rheumatology and Plastics                                                                                 | 5.7  |              |
|                         | Neurosurgery, neurology, vascular medicine, vascular surgery, stroke unit                                                        | 5.6  |              |
|                         | Oncology, haematology, bone marrow transplant, immunology, nephrology, rheumatology, HIV, clinical pharmacology, drugs & alcohol | 5.1  |              |
|                         | Psychiatric emergency care centre                                                                                                | 2.3  |              |
|                         | Gastroenterology, Colorectal surgery, GIT                                                                                        | 6.9  |              |
|                         | Mental Health                                                                                                                    | 1.8  |              |
|                         | ICU                                                                                                                              | 1.1  |              |
|                         | Geriatrics                                                                                                                       | 2.5  |              |
|                         | Others                                                                                                                           | 1.9  |              |
| <b>Procedure blocks</b> | Allied Health Intervention                                                                                                       | 9.1  | No procedure |
|                         | Haemodialysis                                                                                                                    | 4.9  |              |
|                         | Computerised tomography of brain                                                                                                 | 4.8  |              |
|                         | Coronary angiography                                                                                                             | 3.0  |              |
|                         | Panendoscopy with excision                                                                                                       | 2.3  |              |
|                         | Computerised tomography of abdomen and pelvis                                                                                    | 1.7  |              |
|                         | Administration of blood and blood products                                                                                       | 1.6  |              |
|                         | No procedure                                                                                                                     | 27.1 |              |
|                         | Others                                                                                                                           | 45.1 |              |

| <b>Table S4: Categories of primary diagnosis in our cohort, ICD10</b> |       |                                                        |       |
|-----------------------------------------------------------------------|-------|--------------------------------------------------------|-------|
| Cardiac murmurs and other cardiac sounds                              | 4.21% | Gastritis and duodenitis                               | 1.31% |
| Abdominal and pelvic pain                                             | 2.30% | Other forms of heart disease                           | 1.29% |
| Ischaemic heart diseases (I20)                                        | 2.23% | Mental and behavioural disorders due to use of alcohol | 1.27% |
| Syncope and collapse                                                  | 1.86% | Acute appendicitis                                     | 1.17% |
| Transient cerebral ischaemic attacks and related syndromes            | 1.55% | “Others”                                               | 81.4% |
| Ischaemic heart diseases (I25)                                        | 1.35% |                                                        |       |

| <b>Table S5: Comorbidity groups in our cohort (Reference value= no comorbidity)</b> |                    |                                     |                    |
|-------------------------------------------------------------------------------------|--------------------|-------------------------------------|--------------------|
| <b>Comorbidity groups</b>                                                           | <b>Percentages</b> | <b>Comorbidity groups</b>           | <b>Percentages</b> |
| Congestive heart failure (%)                                                        | 3.6                | AIDS/HIV (%)                        | 1.2                |
| Cardiac arrhythmia (%)                                                              | 10.1               | Lymphoma (%)                        | 0.8                |
| Valvular disease (%)                                                                | 2.6                | Metastatic cancer (%)               | 2.3                |
| Pulmonary circulation disorders (%)                                                 | 1.3                | Solid tumor without metastasis (%)  | 5.1                |
| Peripheral vascular disorders (%)                                                   | 2.0                | Rheumatoid arthritis/collagen (%)   | 1.4                |
| Hypertension Uncomplicated (%)                                                      | 21.0               | Coagulopathy (%)                    | 1.2                |
| Hypertension Complicated (%)                                                        | 0.1                | Obesity (%)                         | 2.0                |
| Paralysis (%)                                                                       | 0.6                | Weight loss (%)                     | 0.0                |
| Other neurological disorders (%)                                                    | 3.3                | Fluid and electrolyte disorders (%) | 5.3                |
| Chronic pulmonary disease (%)                                                       | 6.5                | Blood loss anemia (%)               | 0.0                |
| Diabetes uncomplicated (%)                                                          | 2.9                | Deficiency anemia (%)               | 1.5                |
| Diabetes complicated (%)                                                            | 5.8                | Alcohol abuse (%)                   | 7.2                |
| Hypothyroidism (%)                                                                  | 1.7                | Drug abuse (%)                      | 4.3                |
| Renal failure (%)                                                                   | 3.4                | Psychoses (%)                       | 2.8                |
| Liver disease (%)                                                                   | 2.0                | Depression (%)                      | 6.6                |
| Peptic ulcer disease excluding bleeding (%)                                         | 0.7                |                                     |                    |

| Table S6: Pathology variables identified by the hospital laboratory in our cohort (Reference value=missing) |                                                                                                                                                                                                                                                                                                                 |            |              |            |                                                       |                                      |            |              |            |
|-------------------------------------------------------------------------------------------------------------|-----------------------------------------------------------------------------------------------------------------------------------------------------------------------------------------------------------------------------------------------------------------------------------------------------------------|------------|--------------|------------|-------------------------------------------------------|--------------------------------------|------------|--------------|------------|
| Panel                                                                                                       | Pathology tests                                                                                                                                                                                                                                                                                                 | Normal (%) | Abnormal (%) | Missed (%) | Panel                                                 | Pathology tests                      | Normal (%) | Abnormal (%) | Missed (%) |
| Panel 1: Full Blood count (FBC)                                                                             | Haemoglobin<br>White Blood Cell<br>RBC<br>Red Cell<br>Distribution<br>Width<br>Mean<br>Corpuscular<br>Hemoglobin<br>Concentration<br>Hematocrit test<br>Mean<br>Corpuscular<br>Volume<br>Mean<br>Corpuscular<br>Hemoglobin<br>Platelets<br>Meosinophils<br>Monocytes<br>Basophils<br>Lymphocytes<br>Neutrophils | 11.5       | 58.9         | 29.5       | Panel9:<br>International<br>Normalised<br>Ratio (INR) | International<br>Normalised<br>Ratio | 55.2       | 15.1         | 29.7       |
| Panel2: Urea<br>Electrolyte and<br>creatinine (UEC)                                                         | Creatinine<br>Urea<br>Sodium<br>Potassium<br>Chloride<br>Bicarbonate<br>Estimate<br>Glomerular<br>Filtration Rate                                                                                                                                                                                               | 31.7       | 38.6         | 29.7       | Panel10:<br>Troponin I                                | Troponin I                           | 61.9       | 8.4          | 29.7       |
| Panel3: Liver Function<br>Test (LFT)                                                                        | Albumin<br>Total Protein<br>Aspartate<br>Aminotransferase<br>Gamma<br>Glutamyl<br>Transferase<br>Alanine<br>Aminotransferase<br>Total Bilirubin<br>Alkaline<br>Phosphatase                                                                                                                                      | 22.3       | 38.9         | 38.6       | Panel11:<br>Lipase                                    | Lipase                               | 65.5       | 4.8          | 29.7       |
| Panel4: CA/MG/PHOS                                                                                          | Calcium<br>Magnesium<br>Inorganic<br>Phosphate                                                                                                                                                                                                                                                                  | 38.6       | 14.1         | 47.2       | Panel12:<br>Transferrin<br>saturation                 | Transferrin<br>saturation            | 67.7       | 2.5          | 29.7       |
| Panel5: C-Reactive<br>Protein (CRP)                                                                         | C-Reactive<br>Protein                                                                                                                                                                                                                                                                                           | 69.5       | 0.9          | 29.5       | Panel13:<br>Faecal Occult<br>Blood                    | Faecal Occult<br>Blood               | 52.0       | 18.2         | 29.7       |
| Panel6: Activated<br>Partial<br>Thromboplastin<br>Time (APTT)                                               | Activated Partial<br>Thromboplastin<br>Time                                                                                                                                                                                                                                                                     | 42.2       | 28.3         | 29.5       | Panel14:<br>Blood<br>Alcohol<br>Concentration         | Blood<br>Alcohol<br>Concentration    | 59.0       | 10.7         | 30.3       |
| Panel7: Glucose                                                                                             | Glucose                                                                                                                                                                                                                                                                                                         | 52.2       | 18.2         | 29.5       | Panel15:<br>GPScreen                                  | GPScreen                             | 53.6       | 7.7          | 38.7       |
| Panel8: Prothrombin<br>Time (PT)                                                                            | Prothrombin<br>Time                                                                                                                                                                                                                                                                                             | 61.0       | 9.3          | 29.7       | Panel16: Free<br>thyroxine                            | Free<br>thyroxine                    | 51.1       | 9.6          | 38.9       |

**Table S7:** Calibration performance: Observed and expected rates for selected scores can be found in this table.

| 7-days |                  |                  |          | 30-days |                  |                  |          | 60-days |                  |                  |          |
|--------|------------------|------------------|----------|---------|------------------|------------------|----------|---------|------------------|------------------|----------|
| S*     | Number Admission | Readmission rate |          | S*      | Number Admission | Readmission rate |          | S*      | Number Admission | Readmission rate |          |
|        |                  | Observed         | Expected |         |                  | Observed         | Expected |         |                  | Observed         | Expected |
| -3     | 115              | 0.0%             | 0.6%     | 0       | 185              | 1.1%             | 1.8%     | -3      | 2                | 0.0%             | 1.5%     |
| -2     | 144              | 0.7%             | 0.7%     | 1       | 187              | 1.6%             | 2.0%     | -2      | 9                | 0.0%             | 1.7%     |
| -1     | 366              | 0.0%             | 0.8%     | 2       | 693              | 1.4%             | 2.3%     | -1      | 116              | 0.9%             | 1.9%     |
| 0      | 641              | 0.6%             | 0.9%     | 3       | 1049             | 2.3%             | 2.6%     | 0       | 135              | 2.2%             | 2.2%     |
| 1      | 299              | 0.7%             | 1.0%     | 4       | 346              | 3.5%             | 3.0%     | 1       | 85               | 1.2%             | 2.5%     |
| 2      | 383              | 0.8%             | 1.2%     | 5       | 555              | 2.9%             | 3.4%     | 2       | 458              | 1.7%             | 2.8%     |
| 3      | 524              | 0.8%             | 1.3%     | 6       | 657              | 3.7%             | 3.8%     | 3       | 867              | 2.7%             | 3.2%     |
| 4      | 322              | 2.2%             | 1.5%     | 7       | 1011             | 4.6%             | 4.3%     | 4       | 684              | 3.4%             | 3.6%     |
| 5      | 381              | 0.5%             | 1.7%     | 8       | 1084             | 5.4%             | 4.9%     | 5       | 592              | 3.9%             | 4.1%     |
| 6      | 470              | 1.3%             | 2.0%     | 9       | 1072             | 6.3%             | 5.6%     | 6       | 534              | 4.1%             | 4.7%     |
| 7      | 636              | 3.1%             | 2.3%     | 10      | 893              | 5.8%             | 6.3%     | 7       | 709              | 6.6%             | 5.3%     |
| 8      | 803              | 1.6%             | 2.6%     | 11      | 707              | 6.6%             | 7.2%     | 8       | 801              | 6.1%             | 6.0%     |
| 9      | 947              | 3.5%             | 3.0%     | 12      | 552              | 9.1%             | 8.1%     | 9       | 893              | 7.4%             | 6.8%     |
| 10     | 1003             | 3.4%             | 3.4%     | 13      | 432              | 9.7%             | 9.2%     | 10      | 707              | 8.5%             | 7.6%     |
| 11     | 1069             | 3.4%             | 3.8%     | 14      | 355              | 14.6%            | 10.3%    | 11      | 584              | 10.3%            | 8.6%     |
| 12     | 929              | 5.3%             | 4.4%     | 15      | 300              | 14.0%            | 11.6%    | 12      | 471              | 11.3%            | 9.7%     |
| 13     | 733              | 6.0%             | 5.0%     | 16      | 220              | 9.5%             | 13.1%    | 13      | 446              | 12.1%            | 10.8%    |
| 14     | 565              | 5.3%             | 5.7%     | 17      | 157              | 16.6%            | 14.6%    | 14      | 421              | 15.7%            | 12.2%    |
| 15     | 424              | 5.7%             | 6.5%     | 18      | 150              | 16.0%            | 16.4%    | 15      | 338              | 16.0%            | 13.6%    |
| 16     | 277              | 5.8%             | 7.3%     | 19      | 116              | 12.9%            | 18.3%    | 16      | 281              | 16.4%            | 15.2%    |
| 17     | 204              | 6.9%             | 8.3%     | 20      | 101              | 21.8%            | 20.4%    | 17      | 257              | 19.8%            | 17.0%    |
| 18     | 159              | 7.5%             | 9.4%     | 21      | 80               | 26.3%            | 22.6%    | 18      | 195              | 17.9%            | 18.9%    |
| 19     | 141              | 8.5%             | 10.7%    | 22      | 70               | 28.6%            | 25.0%    | 19      | 178              | 20.8%            | 20.9%    |
| 20     | 98               | 12.2%            | 12.0%    | 23      | 61               | 23.0%            | 27.6%    | 20      | 156              | 22.4%            | 23.2%    |
| 21     | 73               | 20.5%            | 13.6%    | 24      | 41               | 29.3%            | 30.3%    | 21      | 121              | 24.8%            | 25.6%    |
| 22     | 49               | 12.2%            | 15.2%    | 25      | 44               | 34.1%            | 33.2%    | 22      | 124              | 29.0%            | 28.1%    |
| 23     | 44               | 27.3%            | 17.1%    | 26      | 28               | 32.1%            | 36.2%    | 23      | 106              | 27.4%            | 30.8%    |
| 24     | 34               | 14.7%            | 19.1%    | 27      | 17               | 29.4%            | 39.3%    | 24      | 87               | 32.2%            | 33.6%    |
| 25     | 20               | 10.0%            | 21.3%    | 28      | 13               | 46.2%            | 42.5%    | 25      | 67               | 35.8%            | 36.6%    |
| 26     | 19               | 26.3%            | 23.7%    | 29      | 14               | 35.7%            | 45.8%    | 26      | 70               | 37.1%            | 39.6%    |
| 27     | 13               | 23.1%            | 26.3%    | 30      | 10               | 50.0%            | 49.1%    | 27      | 59               | 37.3%            | 42.8%    |
| 28     | 2                | 0.0%             | 29.0%    | 31      | 5                | 40.0%            | 52.5%    | 28      | 53               | 47.2%            | 46.0%    |
| 29     | 5                | 20.0%            | 31.9%    | 32      | 1                | 0.0%             | 55.8%    | 29      | 39               | 46.2%            | 49.2%    |
| 30     | 7                | 28.6%            | 34.9%    | 34      | 3                | 33.3%            | 62.2%    | 30      | 18               | 55.6%            | 52.5%    |
| 31     | 5                | 0.0%             | 38.1%    | 35      | 1                | 0.0%             | 65.3%    | 31      | 16               | 56.3%            | 55.7%    |
| 34     | 1                | 0.0%             | 48.1%    |         |                  |                  |          | 32      | 10               | 50.0%            | 58.9%    |
|        |                  |                  |          |         |                  |                  |          | 33      | 6                | 50.0%            | 62.0%    |
|        |                  |                  |          |         |                  |                  |          | 34      | 6                | 16.7%            | 65.0%    |
|        |                  |                  |          |         |                  |                  |          | 35      | 1                | 0.0%             | 67.9%    |
|        |                  |                  |          |         |                  |                  |          | 36      | 1                | 100.0%           | 70.6%    |
|        |                  |                  |          |         |                  |                  |          | 40      | 1                | 100.0%           | 80.2%    |

S\*=Score

**Table S8:** Sensitivity, specificity and PPV for different cut-off scores

| <i>RETURN7</i> |       |       |       |       | <i>RETURN30</i> |       |       |       |       | <i>RETURN60</i> |       |       |       |       |
|----------------|-------|-------|-------|-------|-----------------|-------|-------|-------|-------|-----------------|-------|-------|-------|-------|
| cut-off score  | 10    | 12    | 20    | 30    | cut-off score   | 10    | 12    | 20    | 30    | cut-off score   | 10    | 11    | 20    | 30    |
| SEN            | 77.9% | 61.5% | 14.7% | 0.5%  | SEN             | 65.7% | 52.9% | 17.7% | 1.0%  | SEN             | 75.5% | 70.0% | 27.9% | 2.8%  |
| SPE            | 51.7% | 69.2% | 97.3% | 99.9% | SPE             | 63.0% | 77.4% | 96.6% | 99.9% | SPE             | 58.4% | 65.1% | 93.4% | 99.7% |
| PPV            | 5.7%  | 6.9%  | 17.0% | 15.4% | PPV             | 11.6% | 14.8% | 28.0% | 40.0% | PPV             | 17.0% | 18.5% | 32.2% | 50.8% |
